# Supplementary material for: NK Cells Lose Their Cytotoxicity Function against Cancer Stem Cell-Rich Radiotherapy-Resistant Breast Cancer Cell Populations
Source: MDPI journal article supplement (doi:10.3390/ijms22179639), 2021-09-06
Supplement: s1 [file s1]

<Table S1: Intensity ratios of Western blots for Figure 2A>

|                     |                        |                   |                                 |                                       |                           |
|---------------------|------------------------|-------------------|---------------------------------|---------------------------------------|---------------------------|
| Fig 2A (E-cadherin) | <b>n=1</b>             | <b>E-cadherin</b> | <b><math>\beta</math>-actin</b> | <b>E-cad/<math>\beta</math>-actin</b> | <b>Fold of MDA-MB-231</b> |
|                     | <b>MDA-MB-231</b>      | 45767.321         | 55287.401                       | 0.8278                                | 1                         |
|                     | <b>RT-R-MDA-MB-231</b> | 22469.480         | 46895.338                       | 0.4791                                | 0.5788                    |
|                     | <b>CD24-44+</b>        | 27330.522         | 48287.380                       | 0.5660                                | 0.6837                    |
|                     |                        |                   |                                 |                                       |                           |
|                     | <b>n=2</b>             | <b>E-cadherin</b> | <b><math>\beta</math>-actin</b> | <b>E-cad/<math>\beta</math>-actin</b> | <b>Fold of MDA-MB-231</b> |
|                     | <b>MDA-MB-231</b>      | 42015.714         | 61088.865                       | 0.6878                                | 1                         |
|                     | <b>RT-R-MDA-MB-231</b> | 36957.785         | 61730.258                       | 0.5987                                | 0.8705                    |
|                     | <b>CD24-44+</b>        | 32897.037         | 59652.409                       | 0.5515                                | 0.8018                    |
|                     |                        |                   |                                 |                                       |                           |
|                     | <b>n=3</b>             | <b>E-cadherin</b> | <b><math>\beta</math>-actin</b> | <b>E-cad/<math>\beta</math>-actin</b> | <b>Fold of MDA-MB-231</b> |
|                     | <b>MDA-MB-231</b>      | 53970.551         | 60378.803                       | 0.8939                                | 1                         |
|                     | <b>RT-R-MDA-MB-231</b> | 36683.794         | 60536.338                       | 0.6060                                | 0.6779                    |
|                     | <b>CD24-44+</b>        | 14578.912         | 64575.823                       | 0.2258                                | 0.2526                    |
|                     |                        |                   |                                 |                                       |                           |
|                     | <b>n=4</b>             | <b>E-cadherin</b> | <b><math>\beta</math>-actin</b> | <b>E-cad/<math>\beta</math>-actin</b> | <b>Fold of MDA-MB-231</b> |
|                     | <b>MDA-MB-231</b>      | 52468.271         | 56346.844                       | 0.9312                                | 1                         |
|                     | <b>RT-R-MDA-MB-231</b> | 19855.045         | 57322.380                       | 0.3464                                | 0.3720                    |
|                     | <b>CD24-44+</b>        | 28996.321         | 57471.823                       | 0.5045                                | 0.5418                    |

| n=5             | E-cadherin | $\beta$ -actin | E-cad/ $\beta$ -actin | Fold of MDA-MB-231 |
|-----------------|------------|----------------|-----------------------|--------------------|
| MDA-MB-231      | 43543.200  | 56302.359      | 0.7734                | 1                  |
| RT-R-MDA-MB-231 | 35741.028  | 54175.397      | 0.6597                | 0.8530             |
| CD24-44+        | 14021.296  | 59922.480      | 0.2340                | 0.3026             |

| Fig 2A (N-cadherin) | n=1             | N-cadherin | $\beta$ -actin | N-cad/ $\beta$ -actin | Fold of MDA-MB-231 |
|---------------------|-----------------|------------|----------------|-----------------------|--------------------|
|                     | MDA-MB-231      | 25736.501  | 65639.945      | 0.3921                | 1                  |
|                     | RT-R-MDA-MB-231 | 37438.907  | 62934.116      | 0.5949                | 1.5172             |
|                     | CD24-44+        | 41942.886  | 40010.095      | 1.0483                | 2.6737             |
|                     |                 |            |                |                       |                    |
|                     | n=2             | N-cadherin | $\beta$ -actin | N-cad/ $\beta$ -actin | Fold of MDA-MB-231 |
|                     | MDA-MB-231      | 14695.309  | 57031.844      | 0.2577                | 1                  |
|                     | RT-R-MDA-MB-231 | 24326.137  | 57764.137      | 0.4211                | 1.6344             |
|                     | CD24-44+        | 51826.108  | 53090.409      | 0.9762                | 3.7885             |
|                     |                 |            |                |                       |                    |
|                     | n=3             | N-cadherin | $\beta$ -actin | N-cad/ $\beta$ -actin | Fold of MDA-MB-231 |
|                     | MDA-MB-231      | 16019.681  | 27099.146      | 0.5912                | 1                  |
|                     | RT-R-MDA-MB-231 | 33866.522  | 24484.527      | 1.3832                | 2.3398             |
|                     | CD24-44+        | 51878.693  | 30985.953      | 1.6743                | 2.8322             |

| n=4             | N-cadherin | $\beta$ -actin | N-cad/ $\beta$ -actin | Fold of MDA-MB-231 |
|-----------------|------------|----------------|-----------------------|--------------------|
| MDA-MB-231      | 6922.459   | 65362.430      | 0.1059                | 1                  |
| RT-R-MDA-MB-231 | 10355.066  | 49150.820      | 0.2107                | 1.9893             |
| CD24-44+        | 21460.087  | 56317.953      | 0.3811                | 3.5979             |

  

| n=5             | N-cadherin | $\beta$ -actin | N-cad/ $\beta$ -actin | Fold of MDA-MB-231 |
|-----------------|------------|----------------|-----------------------|--------------------|
| MDA-MB-231      | 15172.108  | 66518.066      | 0.2281                | 1                  |
| RT-R-MDA-MB-231 | 26842.886  | 55259.518      | 0.4858                | 2.1297             |
| CD24-44+        | 50044.007  | 56318.167      | 0.8886                | 3.8958             |

| Fig 2A ( $\beta$ -catenin) | n=1             | $\beta$ -catenin | $\beta$ -actin | $\beta$ -catenin/ $\beta$ -actin | Fold of MDA-MB-231 |
|----------------------------|-----------------|------------------|----------------|----------------------------------|--------------------|
|                            | MDA-MB-231      | 24582.723        | 55327.693      | 0.4443                           | 1                  |
|                            | RT-R-MDA-MB-231 | 41331.057        | 46662.874      | 0.8857                           | 1.9935             |
|                            | CD24-44+        | 51727.421        | 50972.258      | 1.0148                           | 2.2840             |

  

|  | n=2             | $\beta$ -catenin | $\beta$ -actin | $\beta$ -catenin/ $\beta$ -actin | Fold of MDA-MB-231 |
|--|-----------------|------------------|----------------|----------------------------------|--------------------|
|  | MDA-MB-231      | 25808.108        | 64290.087      | 0.4014                           | 1                  |
|  | RT-R-MDA-MB-231 | 43122.158        | 56463.602      | 0.7637                           | 1.9025             |
|  | CD24-44+        | 36495.158        | 45629.945      | 0.7998                           | 1.9924             |

| n=3             | $\beta$ -catenin | $\beta$ -actin | $\beta$ -catenin/ $\beta$ -actin | Fold of MDA-MB-231 |
|-----------------|------------------|----------------|----------------------------------|--------------------|
| MDA-MB-231      | 22769.744        | 58775.874      | 0.3874                           | 1                  |
| RT-R-MDA-MB-231 | 49375.187        | 59512.773      | 0.8297                           | 2.1416             |
| CD24-44+        | 47777.208        | 62288.602      | 0.7670                           | 1.9799             |

| n=4             | $\beta$ -catenin | $\beta$ -actin | $\beta$ -catenin/ $\beta$ -actin | Fold of MDA-MB-231 |
|-----------------|------------------|----------------|----------------------------------|--------------------|
| MDA-MB-231      | 31223.865        | 56233.602      | 0.5553                           | 1                  |
| RT-R-MDA-MB-231 | 41118.735        | 54054.794      | 0.7607                           | 1.3700             |
| CD24-44+        | 48234.401        | 53035.116      | 0.9095                           | 1.6380             |

| n=5             | $\beta$ -catenin | $\beta$ -actin | $\beta$ -catenin/ $\beta$ -actin | Fold of MDA-MB-231 |
|-----------------|------------------|----------------|----------------------------------|--------------------|
| MDA-MB-231      | 24630.815        | 45544.430      | 0.5408                           | 1                  |
| RT-R-MDA-MB-231 | 33480.815        | 31976.388      | 1.0470                           | 1.9361             |
| CD24-44+        | 54002.401        | 47527.744      | 1.1362                           | 2.1010             |

|                |            |           |                |                       |                    |
|----------------|------------|-----------|----------------|-----------------------|--------------------|
| Fig 2A (Snail) | n=1        | Snail     | $\beta$ -actin | Snail/ $\beta$ -actin | Fold of MDA-MB-231 |
|                | MDA-MB-231 | 15274.744 | 52206.936      | 0.2926                | 1                  |

|                        |              |                                 |                                       |                           |
|------------------------|--------------|---------------------------------|---------------------------------------|---------------------------|
| <b>RT-R-MDA-MB-231</b> | 39713.007    | 46285.459                       | 0.8580                                | 2.9325                    |
| <b>CD24-44+</b>        | 54773.915    | 50659.844                       | 1.0812                                | 3.6954                    |
|                        |              |                                 |                                       |                           |
| <b>n=2</b>             | <b>Snail</b> | <b><math>\beta</math>-actin</b> | <b>Snail/<math>\beta</math>-actin</b> | <b>Fold of MDA-MB-231</b> |
| <b>MDA-MB-231</b>      | 16262.853    | 64087.794                       | 0.2538                                | 1                         |
| <b>RT-R-MDA-MB-231</b> | 36306.167    | 57192.137                       | 0.6348                                | 2.5016                    |
| <b>CD24-44+</b>        | 53285.966    | 46197.238                       | 1.1534                                | 4.5454                    |
|                        |              |                                 |                                       |                           |
| <b>n=3</b>             | <b>Snail</b> | <b><math>\beta</math>-actin</b> | <b>Snail/<math>\beta</math>-actin</b> | <b>Fold of MDA-MB-231</b> |
| <b>MDA-MB-231</b>      | 6144.033     | 60042.752                       | 0.1023                                | 1                         |
| <b>RT-R-MDA-MB-231</b> | 13648.024    | 59736.581                       | 0.2285                                | 2.2327                    |
| <b>CD24-44+</b>        | 20122.966    | 64056.945                       | 0.3141                                | 3.0700                    |
|                        |              |                                 |                                       |                           |
| <b>n=4</b>             | <b>Snail</b> | <b><math>\beta</math>-actin</b> | <b>Snail/<math>\beta</math>-actin</b> | <b>Fold of MDA-MB-231</b> |
| <b>MDA-MB-231</b>      | 10433.731    | 56754.016                       | 0.1838                                | 1                         |
| <b>RT-R-MDA-MB-231</b> | 31038.489    | 57634.844                       | 0.5385                                | 2.9294                    |
| <b>CD24-44+</b>        | 25653.095    | 53190.652                       | 0.4823                                | 2.6234                    |
|                        |              |                                 |                                       |                           |
| <b>n=5</b>             | <b>Snail</b> | <b><math>\beta</math>-actin</b> | <b>Snail/<math>\beta</math>-actin</b> | <b>Fold of MDA-MB-231</b> |
| <b>MDA-MB-231</b>      | 2621.033     | 53944.894                       | 0.0486                                | 1                         |
| <b>RT-R-MDA-MB-231</b> | 2641.882     | 41766.004                       | 0.0633                                | 1.3019                    |

|  |                 |           |           |        |        |
|--|-----------------|-----------|-----------|--------|--------|
|  | <b>CD24-44+</b> | 14679.087 | 57376.551 | 0.2558 | 5.2655 |
|--|-----------------|-----------|-----------|--------|--------|

<Table S2: Summary of relative protein levels for Figure 2A>

| <b>E-cadherin</b>         | <b>MDA-MB-231</b> | <b>RT-R-MDA-MB-231</b> | <b>CD24-44+</b> |
|---------------------------|-------------------|------------------------|-----------------|
| n=1                       | 1                 | 0.5788                 | 0.6837          |
| n=2                       | 1                 | 0.8705                 | 0.8018          |
| n=3                       | 1                 | 0.6779                 | 0.2526          |
| n=4                       | 1                 | 0.3720                 | 0.5418          |
| n=5                       | 1                 | 0.8530                 | 0.3026          |
| <b>Mean</b>               | <b>1</b>          | <b>0.6704</b>          | <b>0.5165</b>   |
| <b>Std. Deviation</b>     | <b>0</b>          | <b>0.2067</b>          | <b>0.2374</b>   |
| <b>Std. Error of Mean</b> | <b>0</b>          | <b>0.0924</b>          | <b>0.1062</b>   |

| <b>N-cadherin</b>     | <b>MDA-MB-231</b> | <b>RT-R-MDA-MB-231</b> | <b>CD24-44+</b> |
|-----------------------|-------------------|------------------------|-----------------|
| n=1                   | 1                 | 1.5172                 | 2.6737          |
| n=2                   | 1                 | 1.6344                 | 3.7885          |
| n=3                   | 1                 | 2.3398                 | 2.8322          |
| n=4                   | 1                 | 1.9893                 | 3.5979          |
| n=5                   | 1                 | 2.1297                 | 3.8958          |
| <b>Mean</b>           | <b>1</b>          | <b>1.9220</b>          | <b>3.3580</b>   |
| <b>Std. Deviation</b> | <b>0</b>          | <b>0.3423</b>          | <b>0.5650</b>   |

|                    |   |        |        |
|--------------------|---|--------|--------|
| Std. Error of Mean | 0 | 0.1531 | 0.2527 |
|--------------------|---|--------|--------|

| $\beta$ -catenin          | MDA-MB-231 | RT-R-MDA-MB-231 | CD24-44+      |
|---------------------------|------------|-----------------|---------------|
| n=1                       | 1          | 1.9935          | 2.2840        |
| n=2                       | 1          | 1.9025          | 1.9924        |
| n=3                       | 1          | 2.1416          | 1.9799        |
| n=4                       | 1          | 1.3700          | 1.6380        |
| n=5                       | 1          | 1.9361          | 2.1010        |
| <b>Mean</b>               | <b>1</b>   | <b>1.8690</b>   | <b>1.9990</b> |
| <b>Std. Deviation</b>     | <b>0</b>   | <b>0.2935</b>   | <b>0.2358</b> |
| <b>Std. Error of Mean</b> | <b>0</b>   | <b>0.1312</b>   | <b>0.1055</b> |

| Snail                     | MDA-MB-231 | RT-R-MDA-MB-231 | CD24-44+      |
|---------------------------|------------|-----------------|---------------|
| n=1                       | 1          | 2.9325          | 3.6954        |
| n=2                       | 1          | 2.5016          | 4.5454        |
| n=3                       | 1          | 2.2327          | 3.0700        |
| n=4                       | 1          | 2.6234          | 2.9294        |
| n=5                       | 1          | 1.3019          | 5.2655        |
| <b>Mean</b>               | <b>1</b>   | <b>2.3180</b>   | <b>3.9010</b> |
| <b>Std. Deviation</b>     | <b>0</b>   | <b>0.6214</b>   | <b>0.9943</b> |
| <b>Std. Error of Mean</b> | <b>0</b>   | <b>0.2779</b>   | <b>0.4446</b> |

<Table S3: Intensity ratios of Western blots for Figure 2B>

|                |                 |           |                |                       |                    |
|----------------|-----------------|-----------|----------------|-----------------------|--------------------|
| Fig 2B (ESM-1) | n=1             | ESM-1     | $\beta$ -actin | ESM-1/ $\beta$ -actin | Fold of MDA-MB-231 |
|                | MDA-MB-231      | 16543.643 | 61480.865      | 0.2691                | 1                  |
|                | RT-R-MDA-MB-231 | 28633.886 | 31879.569      | 0.8982                | 3.3379             |
|                | CD24-44+        | 37949.371 | 33287.853      | 1.1400                | 4.2367             |
|                | n=2             | ESM-1     | $\beta$ -actin | ESM-1/ $\beta$ -actin | Fold of MDA-MB-231 |
|                | MDA-MB-231      | 12344.966 | 45040.782      | 0.2741                | 1                  |
|                | RT-R-MDA-MB-231 | 41074.785 | 46524.740      | 0.8829                | 3.2211             |
|                | CD24-44+        | 57760.279 | 51894.581      | 1.1130                | 4.0609             |
|                | n=3             | ESM-1     | $\beta$ -actin | ESM-1/ $\beta$ -actin | Fold of MDA-MB-231 |
|                | MDA-MB-231      | 16845.593 | 55656.309      | 0.3027                | 1                  |
|                | RT-R-MDA-MB-231 | 36944.836 | 56165.974      | 0.6578                | 2.1732             |
|                | CD24-44+        | 46886.865 | 59165.066      | 0.7925                | 2.6183             |
|                | n=4             | ESM-1     | $\beta$ -actin | ESM-1/ $\beta$ -actin | Fold of MDA-MB-231 |
|                | MDA-MB-231      | 23422.258 | 58109.037      | 0.4031                | 1                  |
|                | RT-R-MDA-MB-231 | 34861.472 | 52210.731      | 0.6677                | 1.6565             |
|                | CD24-44+        | 43870.907 | 54081.602      | 0.8112                | 2.0125             |



|  |                        |              |                |                      |                           |
|--|------------------------|--------------|----------------|----------------------|---------------------------|
|  | <b>n=5</b>             | <b>ESM-1</b> | <b>β-actin</b> | <b>ESM-1/β-actin</b> | <b>Fold of MDA-MB-231</b> |
|  | <b>MDA-MB-231</b>      | 16392.794    | 48317.543      | 0.3393               | 1                         |
|  | <b>RT-R-MDA-MB-231</b> | 32523.836    | 41266.380      | 0.7881               | 2.3230                    |
|  | <b>CD24-44+</b>        | 54836.865    | 50078.087      | 1.0950               | 3.2276                    |

<Table S4: Summary of relative protein levels for Figure 2B>

| <b>ESM-1</b>              | <b>MDA-MB-231</b> | <b>RT-R-MDA-MB-231</b> | <b>CD24-44+</b> |
|---------------------------|-------------------|------------------------|-----------------|
| n=1                       | 1                 | 3.3379                 | 4.2367          |
| n=2                       | 1                 | 3.2211                 | 4.0609          |
| n=3                       | 1                 | 2.1732                 | 2.6183          |
| n=4                       | 1                 | 1.6565                 | 2.0125          |
| n=5                       | 1                 | 2.3230                 | 3.2276          |
| <b>Mean</b>               | <b>1</b>          | <b>2.5420</b>          | <b>3.2310</b>   |
| <b>Std. Deviation</b>     | <b>0</b>          | <b>0.7181</b>          | <b>0.9434</b>   |
| <b>Std. Error of Mean</b> | <b>0</b>          | <b>0.3211</b>          | <b>0.4219</b>   |

<Table S5: Intensity ratios of Western blots for Figure 2C>

|                          |                 |                |                |                                 |                    |
|--------------------------|-----------------|----------------|----------------|---------------------------------|--------------------|
| Fig 2C (HIF-1 $\alpha$ ) | n=1             | HIF-1 $\alpha$ | $\beta$ -actin | HIF-1 $\alpha$ / $\beta$ -actin | Fold of MDA-MB-231 |
|                          | MDA-MB-231      | 2660.477       | 46163.007      | 0.0576                          | 1                  |
|                          | RT-R-MDA-MB-231 | 6223.104       | 31593.250      | 0.1970                          | 3.4178             |
|                          | CD24-44+        | 7677.326       | 44587.915      | 0.1722                          | 2.9876             |
|                          |                 |                |                |                                 |                    |
|                          | n=2             | HIF-1 $\alpha$ | $\beta$ -actin | HIF-1 $\alpha$ / $\beta$ -actin | Fold of MDA-MB-231 |
|                          | MDA-MB-231      | 6800.891       | 35559.359      | 0.1913                          | 1                  |
|                          | RT-R-MDA-MB-231 | 16161.459      | 43679.359      | 0.3700                          | 1.9346             |
|                          | CD24-44+        | 33679.087      | 50704.238      | 0.6642                          | 3.4730             |
|                          |                 |                |                |                                 |                    |
|                          | n=3             | HIF-1 $\alpha$ | $\beta$ -actin | HIF-1 $\alpha$ / $\beta$ -actin | Fold of MDA-MB-231 |
|                          | MDA-MB-231      | 6200.983       | 50331.388      | 0.1232                          | 1                  |
|                          | RT-R-MDA-MB-231 | 14566.974      | 64547.368      | 0.2257                          | 1.8318             |
|                          | CD24-44+        | 23620.009      | 61703.803      | 0.3828                          | 3.1070             |
|                          |                 |                |                |                                 |                    |
|                          | n=4             | HIF-1 $\alpha$ | $\beta$ -actin | HIF-1 $\alpha$ / $\beta$ -actin | Fold of MDA-MB-231 |
|                          | MDA-MB-231      | 6677.376       | 50286.723      | 0.1328                          | 1                  |
|                          | RT-R-MDA-MB-231 | 18680.401      | 48428.581      | 0.3857                          | 2.9049             |
|                          | CD24-44+        | 27919.815      | 54597.652      | 0.5114                          | 3.8511             |

|                 | n=5 | HIF-1 $\alpha$ | $\beta$ -actin | HIF-1 $\alpha$ / $\beta$ -actin | Fold of MDA-MB-231 |
|-----------------|-----|----------------|----------------|---------------------------------|--------------------|
| MDA-MB-231      |     | 15892.844      | 60732.401      | 0.2617                          | 1                  |
| RT-R-MDA-MB-231 |     | 39933.442      | 52109.459      | 0.7663                          | 2.9285             |
| CD24-44+        |     | 48503.350      | 55090.823      | 0.8804                          | 3.3644             |

<Table S6: Summary of relative protein levels for Figure 2C>

| HIF-1 $\alpha$            | MDA-MB-231 | RT-R-MDA-MB-231 | CD24-44+      |
|---------------------------|------------|-----------------|---------------|
| n=1                       | 1          | 3.4178          | 2.9876        |
| n=2                       | 1          | 1.9346          | 3.4730        |
| n=3                       | 1          | 1.8318          | 3.1070        |
| n=4                       | 1          | 2.9049          | 3.8511        |
| n=5                       | 1          | 2.9285          | 3.3644        |
| <b>Mean</b>               | <b>1</b>   | <b>2.6040</b>   | <b>3.3570</b> |
| <b>Std. Deviation</b>     | <b>0</b>   | <b>0.6897</b>   | <b>0.3378</b> |
| <b>Std. Error of Mean</b> | <b>0</b>   | <b>0.3084</b>   | <b>0.1511</b> |

<Table S7: Intensity ratios of Western blots for Figure 2D>

|              |                        |            |                                 |                                     |                           |
|--------------|------------------------|------------|---------------------------------|-------------------------------------|---------------------------|
| Fig 2D (LOX) | <b>n=1</b>             | <b>LOX</b> | <b><math>\beta</math>-actin</b> | <b>LOX/<math>\beta</math>-actin</b> | <b>Fold of MDA-MB-231</b> |
|              | <b>MDA-MB-231</b>      | 12490.698  | 50140.530                       | 0.2491                              | 1                         |
|              | <b>RT-R-MDA-MB-231</b> | 57525.602  | 63226.246                       | 0.9098                              | 3.6523                    |
|              | <b>CD24-44+</b>        | 56879.581  | 54361.966                       | 1.0463                              | 4.2001                    |
|              |                        |            |                                 |                                     |                           |
|              | <b>n=2</b>             | <b>LOX</b> | <b><math>\beta</math>-actin</b> | <b>LOX/<math>\beta</math>-actin</b> | <b>Fold of MDA-MB-231</b> |
|              | <b>MDA-MB-231</b>      | 5601.305   | 50681.309                       | 0.1105                              | 1                         |
|              | <b>RT-R-MDA-MB-231</b> | 10862.924  | 59539.217                       | 0.1824                              | 1.6508                    |
|              | <b>CD24-44+</b>        | 47638.622  | 62669.894                       | 0.7602                              | 6.8779                    |
|              |                        |            |                                 |                                     |                           |
|              | <b>n=3</b>             | <b>LOX</b> | <b><math>\beta</math>-actin</b> | <b>LOX/<math>\beta</math>-actin</b> | <b>Fold of MDA-MB-231</b> |
|              | <b>MDA-MB-231</b>      | 12750.971  | 45891.329                       | 0.2779                              | 1                         |
|              | <b>RT-R-MDA-MB-231</b> | 59094.693  | 66753.137                       | 0.8853                              | 3.1861                    |
|              | <b>CD24-44+</b>        | 47350.803  | 49860.995                       | 0.9497                              | 3.4179                    |
|              |                        |            |                                 |                                     |                           |
|              | <b>n=4</b>             | <b>LOX</b> | <b><math>\beta</math>-actin</b> | <b>LOX/<math>\beta</math>-actin</b> | <b>Fold of MDA-MB-231</b> |
|              | <b>MDA-MB-231</b>      | 14036.167  | 45521.894                       | 0.3083                              | 1                         |
|              | <b>RT-R-MDA-MB-231</b> | 16632.844  | 36585.974                       | 0.4546                              | 1.4744                    |
|              | <b>CD24-44+</b>        | 45204.099  | 49359.128                       | 0.9158                              | 2.9702                    |

|  |                        |            |                |                    |                           |
|--|------------------------|------------|----------------|--------------------|---------------------------|
|  | <b>n=5</b>             | <b>LOX</b> | <b>β-actin</b> | <b>LOX/β-actin</b> | <b>Fold of MDA-MB-231</b> |
|  | <b>MDA-MB-231</b>      | 10520.995  | 44865.622      | 0.2345             | 1                         |
|  | <b>RT-R-MDA-MB-231</b> | 14580.288  | 35113.660      | 0.4152             | 1.7707                    |
|  | <b>CD24-44+</b>        | 46347.522  | 52873.936      | 0.8766             | 3.7380                    |

<Table S8: Summary of relative protein levels for Figure 2D>

| <b>LOX</b>                | <b>MDA-MB-231</b> | <b>RT-R-MDA-MB-231</b> | <b>CD24-44+</b> |
|---------------------------|-------------------|------------------------|-----------------|
| n=1                       | 1                 | 3.6523                 | 4.2001          |
| n=2                       | 1                 | 1.6508                 | 6.8779          |
| n=3                       | 1                 | 3.1861                 | 3.4179          |
| n=4                       | 1                 | 1.4744                 | 2.9702          |
| n=5                       | 1                 | 1.7707                 | 3.7380          |
| Mean                      | 1                 | 2.3470                 | 4.2410          |
| <b>Std. Deviation</b>     | <b>0</b>          | <b>0.9983</b>          | <b>1.5410</b>   |
| <b>Std. Error of Mean</b> | <b>0</b>          | <b>0.4464</b>          | <b>0.6892</b>   |

<Table S9: Intensity ratios of Western blots for Figure 4B>

|                 |                        |               |                |                       |                           |
|-----------------|------------------------|---------------|----------------|-----------------------|---------------------------|
| Fig 4B (MICA/B) | <b>n=1</b>             | <b>MICA/B</b> | <b>β-actin</b> | <b>MICA/B/β-actin</b> | <b>Fold of MDA-MB-231</b> |
|                 | <b>MDA-MB-231</b>      | 38353.856     | 53827.936      | 0.7125                | 1                         |
|                 | <b>RT-R-MDA-MB-231</b> | 18660.966     | 49602.652      | 0.3762                | 0.5280                    |
|                 | <b>CD24-44+</b>        | 28597.300     | 46618.894      | 0.6134                | 0.8609                    |
|                 |                        |               |                |                       |                           |
|                 | <b>n=2</b>             | <b>MICA/B</b> | <b>β-actin</b> | <b>MICA/B/β-actin</b> | <b>Fold of MDA-MB-231</b> |
|                 | <b>MDA-MB-231</b>      | 48146.543     | 60901.744      | 0.7906                | 1                         |
|                 | <b>RT-R-MDA-MB-231</b> | 44970.078     | 57929.539      | 0.7763                | 0.9819                    |
|                 | <b>CD24-44+</b>        | 36845.229     | 58088.530      | 0.6343                | 0.8023                    |
|                 |                        |               |                |                       |                           |
|                 | <b>n=3</b>             | <b>MICA/B</b> | <b>β-actin</b> | <b>MICA/B/β-actin</b> | <b>Fold of MDA-MB-231</b> |
|                 | <b>MDA-MB-231</b>      | 41879.966     | 51066.057      | 0.8201                | 1                         |
|                 | <b>RT-R-MDA-MB-231</b> | 14517.217     | 44000.673      | 0.3299                | 0.4023                    |
|                 | <b>CD24-44+</b>        | 22328.765     | 42318.167      | 0.5276                | 0.6434                    |
|                 |                        |               |                |                       |                           |
|                 | <b>n=4</b>             | <b>MICA/B</b> | <b>β-actin</b> | <b>MICA/B/β-actin</b> | <b>Fold of MDA-MB-231</b> |
|                 | <b>MDA-MB-231</b>      | 43752.472     | 56742.530      | 0.7711                | 1                         |
|                 | <b>RT-R-MDA-MB-231</b> | 20431.610     | 53170.380      | 0.3843                | 0.4984                    |
|                 | <b>CD24-44+</b>        | 24705.563     | 54667.853      | 0.4519                | 0.5861                    |

| <b>n=5</b>             | <b>MICA/B</b> | <b>β-actin</b> | <b>MICA/B/β-actin</b> | <b>Fold of MDA-MB-231</b> |
|------------------------|---------------|----------------|-----------------------|---------------------------|
| <b>MDA-MB-231</b>      | 38519.421     | 44997.794      | 0.8560                | 1                         |
| <b>RT-R-MDA-MB-231</b> | 29729.087     | 48119.087      | 0.6178                | 0.7217                    |
| <b>CD24-44+</b>        | 33413.087     | 55532.652      | 0.6017                | 0.7029                    |

| <b>Fig 4B (HLA-E)</b> | <b>n=1</b>             | <b>HLA-E</b> | <b>β-actin</b> | <b>HLA-E/β-actin</b> | <b>Fold of MDA-MB-231</b> |
|-----------------------|------------------------|--------------|----------------|----------------------|---------------------------|
|                       | <b>MDA-MB-231</b>      | 20532.066    | 66057.773      | 0.3108               | 1                         |
|                       | <b>RT-R-MDA-MB-231</b> | 43185.915    | 56005.368      | 0.7711               | 2.4809                    |
|                       | <b>CD24-44+</b>        | 46312.501    | 52586.853      | 0.8807               | 2.8334                    |
|                       |                        |              |                |                      |                           |
|                       | <b>n=2</b>             | <b>HLA-E</b> | <b>β-actin</b> | <b>HLA-E/β-actin</b> | <b>Fold of MDA-MB-231</b> |
|                       | <b>MDA-MB-231</b>      | 21484.501    | 54231.329      | 0.3962               | 1                         |
|                       | <b>RT-R-MDA-MB-231</b> | 48170.451    | 53660.945      | 0.8977               | 2.2659                    |
|                       | <b>CD24-44+</b>        | 44237.986    | 47934.309      | 0.9229               | 2.3296                    |
|                       |                        |              |                |                      |                           |
|                       | <b>n=3</b>             | <b>HLA-E</b> | <b>β-actin</b> | <b>HLA-E/β-actin</b> | <b>Fold of MDA-MB-231</b> |
|                       | <b>MDA-MB-231</b>      | 25823.108    | 50298.693      | 0.5134               | 1                         |
|                       | <b>RT-R-MDA-MB-231</b> | 48141.158    | 46365.551      | 1.0383               | 2.0224                    |
|                       | <b>CD24-44+</b>        | 37334.602    | 35687.702      | 1.0461               | 2.0377                    |
|                       |                        |              |                |                      |                           |
|                       | <b>n=4</b>             | <b>HLA-E</b> | <b>β-actin</b> | <b>HLA-E/β-actin</b> | <b>Fold of MDA-MB-231</b> |

|  |                        |              |                |                      |                           |
|--|------------------------|--------------|----------------|----------------------|---------------------------|
|  | <b>MDA-MB-231</b>      | 5627.933     | 52122.167      | 0.1080               | 1                         |
|  | <b>RT-R-MDA-MB-231</b> | 11154.560    | 50384.037      | 0.2214               | 2.0504                    |
|  | <b>CD24-44+</b>        | 11283.246    | 50160.045      | 0.2249               | 2.0833                    |
|  |                        |              |                |                      |                           |
|  | <b>n=5</b>             | <b>HLA-E</b> | <b>β-actin</b> | <b>HLA-E/β-actin</b> | <b>Fold of MDA-MB-231</b> |
|  | <b>MDA-MB-231</b>      | 28505.401    | 54339.673      | 0.5246               | 1                         |
|  | <b>RT-R-MDA-MB-231</b> | 45096.300    | 50763.158      | 0.8884               | 1.6935                    |
|  | <b>CD24-44+</b>        | 35697.986    | 32983.652      | 1.0823               | 2.0632                    |
|  |                        |              |                |                      |                           |
|  |                        |              |                |                      |                           |

<Table S10: Summary of relative protein levels for Figure 4B>

| <b>MICA/B</b>             | <b>MDA-MB-231</b> | <b>RT-R-MDA-MB-231</b> | <b>CD24-44+</b> |
|---------------------------|-------------------|------------------------|-----------------|
| n=1                       | 1                 | 0.5280                 | 0.8609          |
| n=2                       | 1                 | 0.9819                 | 0.8023          |
| n=3                       | 1                 | 0.4023                 | 0.6434          |
| n=4                       | 1                 | 0.4984                 | 0.5861          |
| n=5                       | 1                 | 0.7217                 | 0.7029          |
| <b>Mean</b>               | <b>1</b>          | <b>0.6265</b>          | <b>0.7191</b>   |
| <b>Std. Deviation</b>     | <b>0</b>          | <b>0.2301</b>          | <b>0.1126</b>   |
| <b>Std. Error of Mean</b> | <b>0</b>          | <b>0.1029</b>          | <b>0.0504</b>   |

| <b>HLA-E</b> | <b>MDA-MB-231</b> | <b>RT-R-MDA-MB-231</b> | <b>CD24-44+</b> |
|--------------|-------------------|------------------------|-----------------|
|--------------|-------------------|------------------------|-----------------|



|                           |          |               |               |
|---------------------------|----------|---------------|---------------|
| n=1                       | 1        | 2.4809        | 2.8334        |
| n=2                       | 1        | 2.2659        | 2.3296        |
| n=3                       | 1        | 2.0224        | 2.0377        |
| n=4                       | 1        | 2.0504        | 2.0833        |
| n=5                       | 1        | 1.6935        | 2.0632        |
| <b>Mean</b>               | <b>1</b> | <b>2.1030</b> | <b>2.2690</b> |
| <b>Std. Deviation</b>     | <b>0</b> | <b>0.2942</b> | <b>0.3364</b> |
| <b>Std. Error of Mean</b> | <b>0</b> | <b>0.1316</b> | <b>0.1504</b> |

<Table S11: Intensity ratios of Western blots for Figure 4C>

|                                    |                        |                  |                |                          |                           |
|------------------------------------|------------------------|------------------|----------------|--------------------------|---------------------------|
| <b>Fig 4C (pre-mature ADAM-10)</b> | <b>n=1</b>             | <b>p-ADAM-10</b> | <b>β-actin</b> | <b>p-ADAM-10/β-actin</b> | <b>Fold of MDA-MB-231</b> |
|                                    | <b>MDA-MB-231</b>      | 45249.472        | 56433.095      | 0.8018                   | 1                         |
|                                    | <b>RT-R-MDA-MB-231</b> | 24984.007        | 61412.217      | 0.4068                   | 0.5074                    |
|                                    | <b>CD24-44+</b>        | 9900.681         | 53002.794      | 0.1868                   | 0.2330                    |
|                                    |                        |                  |                |                          |                           |
|                                    | <b>n=2</b>             | <b>p-ADAM-10</b> | <b>β-actin</b> | <b>p-ADAM-10/β-actin</b> | <b>Fold of MDA-MB-231</b> |
|                                    | <b>MDA-MB-231</b>      | 49301.572        | 56281.380      | 0.8760                   | 1                         |
|                                    | <b>RT-R-MDA-MB-231</b> | 11563.924        | 46585.368      | 0.2482                   | 0.2834                    |
|                                    | <b>CD24-44+</b>        | 13601.388        | 57030.409      | 0.2385                   | 0.2723                    |
|                                    |                        |                  |                |                          |                           |
|                                    | <b>n=3</b>             | <b>p-ADAM-10</b> | <b>β-actin</b> | <b>p-ADAM-10/β-actin</b> | <b>Fold of MDA-MB-231</b> |
|                                    | <b>MDA-MB-231</b>      | 56018.907        | 60388.309      | 0.9276                   | 1                         |
|                                    | <b>RT-R-MDA-MB-231</b> | 9534.137         | 48917.116      | 0.1949                   | 0.2101                    |
|                                    | <b>CD24-44+</b>        | 11368.338        | 51003.409      | 0.2229                   | 0.2403                    |
|                                    |                        |                  |                |                          |                           |
|                                    | <b>n=4</b>             | <b>p-ADAM-10</b> | <b>β-actin</b> | <b>p-ADAM-10/β-actin</b> | <b>Fold of MDA-MB-231</b> |
|                                    | <b>MDA-MB-231</b>      | 46340.765        | 57147.551      | 0.8109                   | 1                         |
|                                    | <b>RT-R-MDA-MB-231</b> | 9247.459         | 52907.966      | 0.1748                   | 0.2155                    |
|                                    | <b>CD24-44+</b>        | 8979.388         | 40626.459      | 0.2210                   | 0.2726                    |

|                 | n=5 | p-ADAM-10 | $\beta$ -actin | p-ADAM-10/ $\beta$ -actin | Fold of MDA-MB-231 |
|-----------------|-----|-----------|----------------|---------------------------|--------------------|
| MDA-MB-231      |     | 21175.794 | 56740.915      | 0.3732                    | 1                  |
| RT-R-MDA-MB-231 |     | 2999.335  | 50194.915      | 0.0598                    | 0.1601             |
| CD24-44+        |     | 3579.891  | 53260.480      | 0.0672                    | 0.1801             |

|                         |                 |           |                |                           |                    |
|-------------------------|-----------------|-----------|----------------|---------------------------|--------------------|
| Fig 4C (mature ADAM-10) | n=1             | m-ADAM-10 | $\beta$ -actin | m-ADAM-10/ $\beta$ -actin | Fold of MDA-MB-231 |
|                         | MDA-MB-231      | 12552.631 | 56433.095      | 0.2224                    | 1                  |
|                         | RT-R-MDA-MB-231 | 37451.472 | 61412.217      | 0.6098                    | 2.7417             |
|                         | CD24-44+        | 30347.823 | 53002.794      | 0.5726                    | 2.5741             |
|                         |                 |           |                |                           |                    |
|                         | n=2             | m-ADAM-10 | $\beta$ -actin | m-ADAM-10/ $\beta$ -actin | Fold of MDA-MB-231 |
|                         | MDA-MB-231      | 22682.108 | 56281.380      | 0.4030                    | 1                  |
|                         | RT-R-MDA-MB-231 | 49141.936 | 46585.368      | 1.0549                    | 2.6175             |
|                         | CD24-44+        | 51244.794 | 57030.409      | 0.8986                    | 2.2296             |
|                         |                 |           |                |                           |                    |
|                         | n=3             | m-ADAM-10 | $\beta$ -actin | m-ADAM-10/ $\beta$ -actin | Fold of MDA-MB-231 |
|                         | MDA-MB-231      | 28637.279 | 60388.309      | 0.4742                    | 1                  |
|                         | RT-R-MDA-MB-231 | 48441.179 | 48917.116      | 0.9903                    | 2.0882             |
|                         | CD24-44+        | 47892.451 | 51003.409      | 0.9390                    | 1.9801             |
|                         |                 |           |                |                           |                    |
|                         | n=4             | m-ADAM-10 | $\beta$ -actin | m-ADAM-10/ $\beta$ -actin | Fold of MDA-MB-231 |

|  |                        |                  |                |                          |                           |
|--|------------------------|------------------|----------------|--------------------------|---------------------------|
|  | <b>MDA-MB-231</b>      | 29686.279        | 57147.551      | 0.5195                   | 1                         |
|  | <b>RT-R-MDA-MB-231</b> | 48283.936        | 52907.966      | 0.9126                   | 1.7568                    |
|  | <b>CD24-44+</b>        | 52207.622        | 40626.459      | 1.2851                   | 2.4738                    |
|  |                        |                  |                |                          |                           |
|  | <b>n=5</b>             | <b>m-ADAM-10</b> | <b>β-actin</b> | <b>m-ADAM-10/β-actin</b> | <b>Fold of MDA-MB-231</b> |
|  | <b>MDA-MB-231</b>      | 23805.794        | 56740.915      | 0.4196                   | 1                         |
|  | <b>RT-R-MDA-MB-231</b> | 28205.128        | 50194.915      | 0.5619                   | 1.3393                    |
|  | <b>CD24-44+</b>        | 48041.279        | 53260.480      | 0.9020                   | 2.1499                    |

<Table S12: Summary of relative protein levels for Figure 4C>

| <b>p-ADAM-10</b>          | <b>MDA-MB-231</b> | <b>RT-R-MDA-MB-231</b> | <b>CD24-44+</b> |
|---------------------------|-------------------|------------------------|-----------------|
| n=1                       | 1                 | 0.5074                 | 0.2330          |
| n=2                       | 1                 | 0.2834                 | 0.2723          |
| n=3                       | 1                 | 0.2101                 | 0.2403          |
| n=4                       | 1                 | 0.2155                 | 0.2726          |
| n=5                       | 1                 | 0.1601                 | 0.1801          |
| <b>Mean</b>               | <b>1</b>          | <b>0.2753</b>          | <b>0.2396</b>   |
| <b>Std. Deviation</b>     | <b>0</b>          | <b>0.1369</b>          | <b>0.0379</b>   |
| <b>Std. Error of Mean</b> | <b>0</b>          | <b>0.0612</b>          | <b>0.0169</b>   |

| <b>m-ADAM-10</b> | <b>MDA-MB-231</b> | <b>RT-R-MDA-MB-231</b> | <b>CD24-44+</b> |
|------------------|-------------------|------------------------|-----------------|
|------------------|-------------------|------------------------|-----------------|

|                           |          |               |               |
|---------------------------|----------|---------------|---------------|
| n=1                       | 1        | 2.7417        | 2.5741        |
| n=2                       | 1        | 2.6175        | 2.2296        |
| n=3                       | 1        | 2.0882        | 1.9801        |
| n=4                       | 1        | 1.7568        | 2.4738        |
| n=5                       | 1        | 1.3393        | 2.1499        |
| <b>Mean</b>               | <b>1</b> | <b>2.1090</b> | <b>2.2820</b> |
| <b>Std. Deviation</b>     | <b>0</b> | <b>0.5865</b> | <b>0.2416</b> |
| <b>Std. Error of Mean</b> | <b>0</b> | <b>0.2623</b> | <b>0.1080</b> |
