# Supplementary material for: NK Cells Lose Their Cytotoxicity Function against Cancer Stem Cell-Rich Radiotherapy-Resistant Breast Cancer Cell Populations
Source: MDPI journal article supplement (doi:10.3390/ijms22179639), 2021-09-06

## <Supplementary Materials: Figure S1>

### Raw images of western blotting (1/3)

Figure 2A

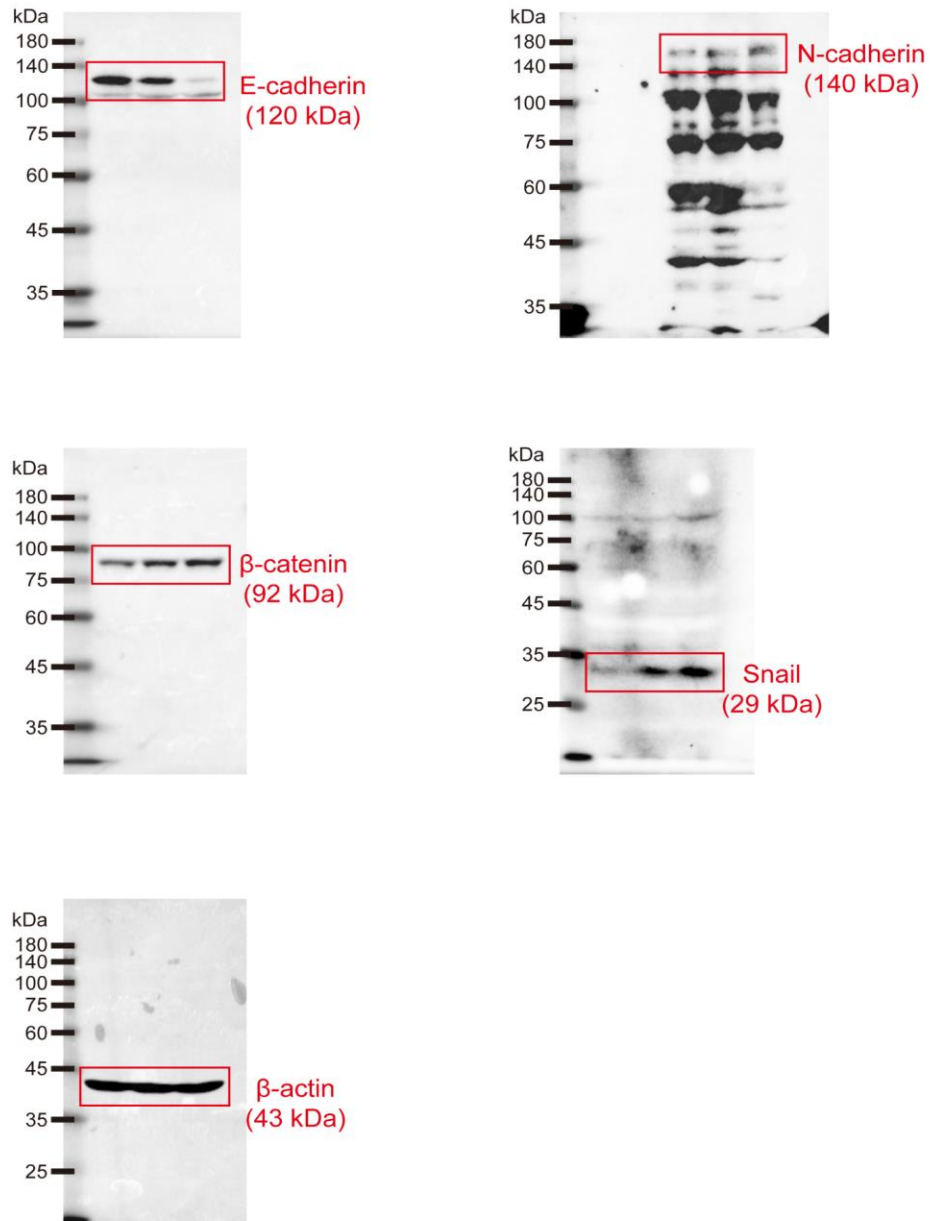

## Raw images of western blotting (2/3)

**Figure 2B**

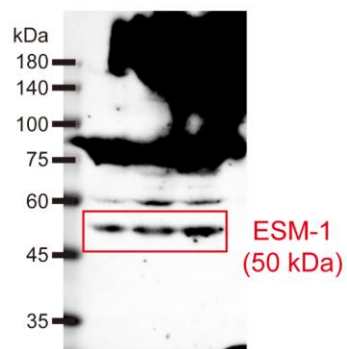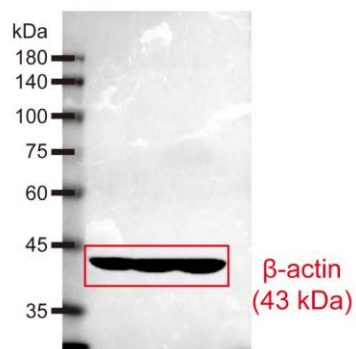

**Figure 2C**

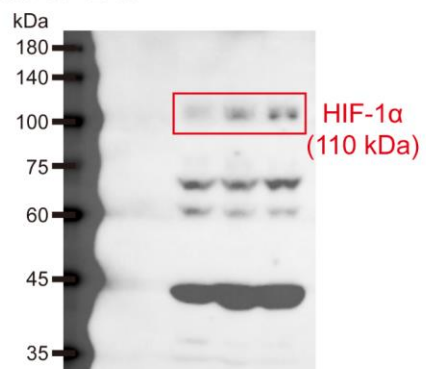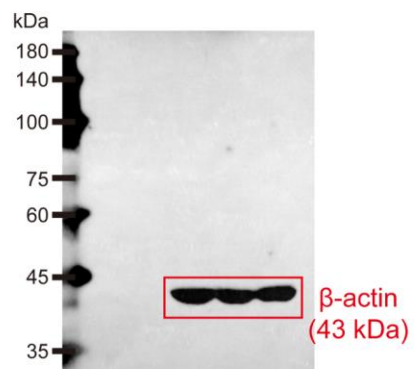

**Figure 2D**

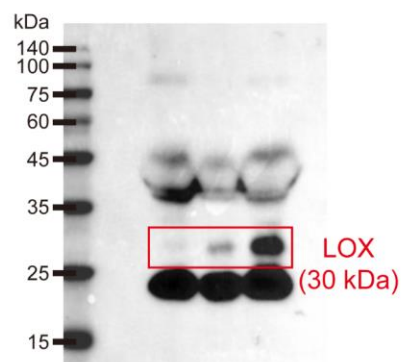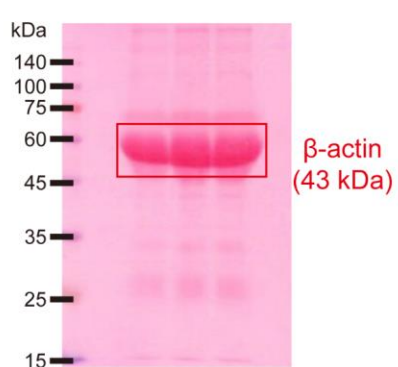

## Raw images of western blotting (3/3)

**Figure 4B**

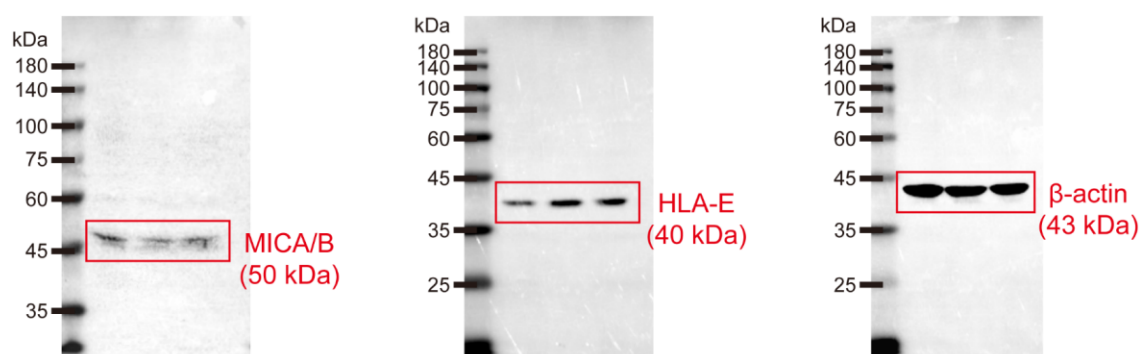

**Figure 4C**

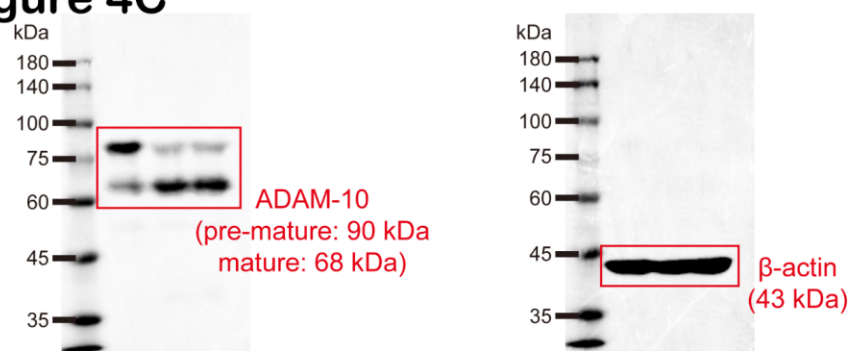

Supplement: s1 [file s1]
